# Supplementary material for: An alumina stabilized graphene oxide wrapped SnO2 hollow sphere LIB anode with improved lithium storage
Source: Royal Society of Chemistry journal article supplement (doi:10.1039/c5ra22482a), 2015-01-01
Supplement: c5ra22482a1.pdf [file c5ra22482a1.pdf]

## Supporting Information

### **Alumina stabilized graphene oxide wrapped SnO<sub>2</sub> hollow sphere LIB anode with improved lithium storage**

*Xiang Liu,<sup>a</sup> Qian Sun,<sup>a</sup> Alan M. C. Ng,<sup>a,b</sup> A. B. Djurišić,<sup>\*a</sup> Mao Hai Xie,<sup>a</sup> Baohu Dai,<sup>c</sup> Jinyao Tang,<sup>c</sup> and Charles Surya<sup>d</sup>, Changzhong Liao,<sup>e</sup> Kaimin Shih<sup>e</sup>*

<sup>a</sup>Department of Physics, University of Hong Kong, Pokfulam Road, Hong Kong

<sup>b</sup>Department of Physics, South University of Science and Technology of China, Shenzhen, China

<sup>c</sup>Department of Chemistry, University of Hong Kong, Pokfulam Road, Hong Kong

<sup>d</sup>Department of Electronic and Information Engineering, Hong Kong Polytechnic University, Hung Hom, Kowloon, Hong Kong

<sup>e</sup>Department of Civil Engineering, University of Hong Kong, Pokfulam Road, Hong Kong

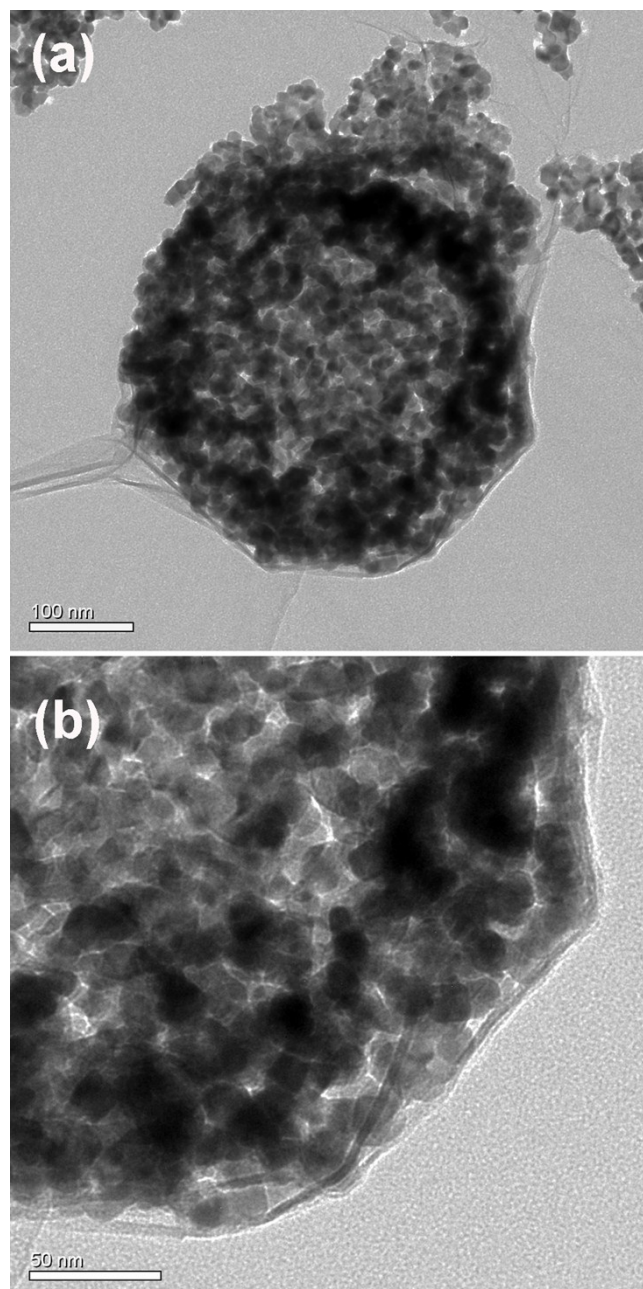

**Figure S1.** TEM images of GO wrapped SnO<sub>2</sub> hollow nanosphere.

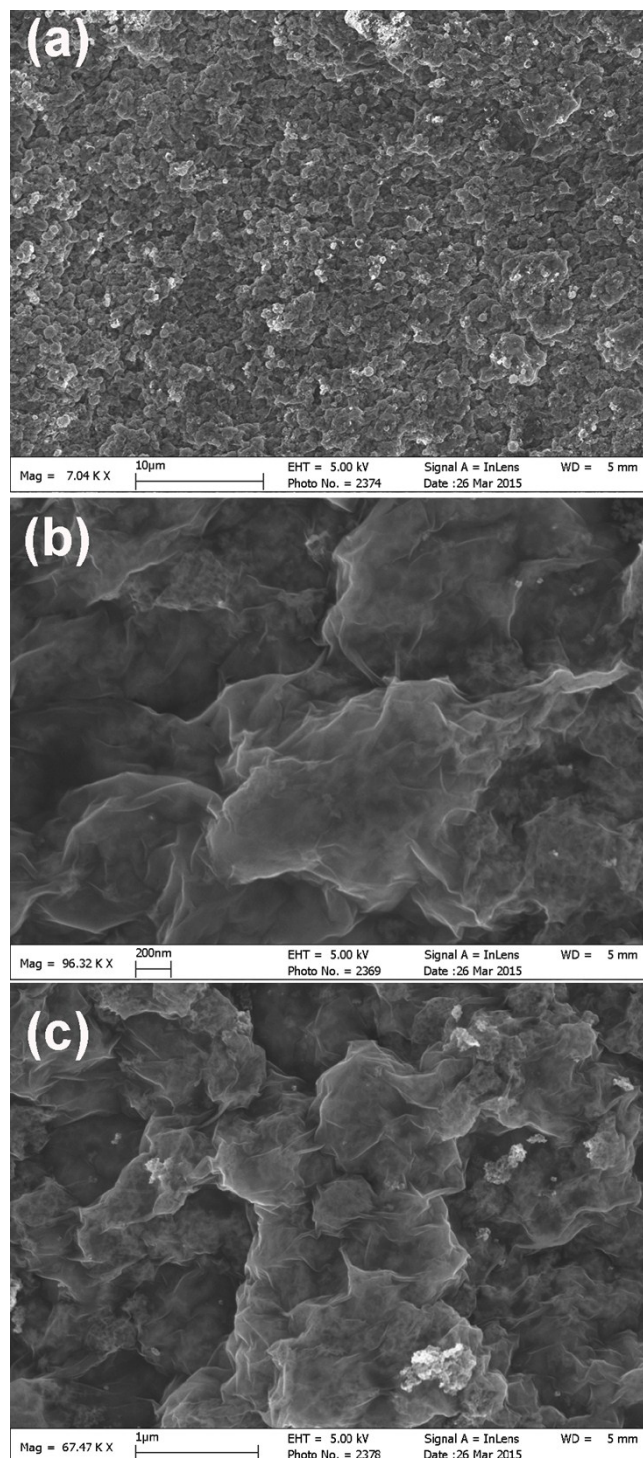

**Figure S2.** SEM images of GO wrapped  $\text{SnO}_2$  hollow nanospheres.

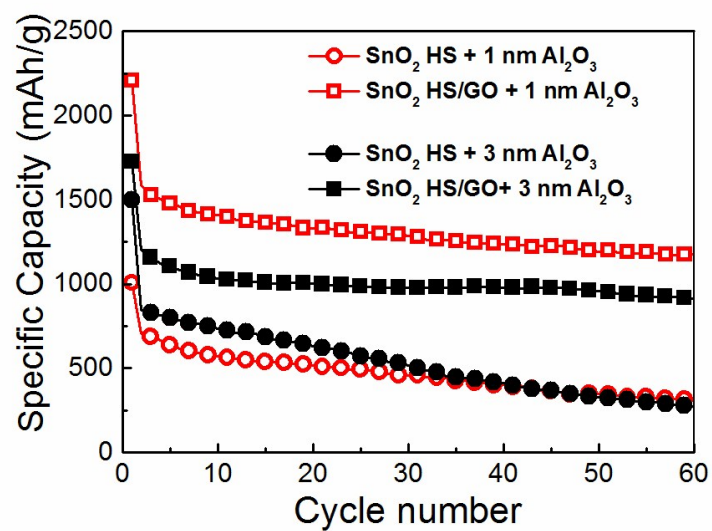

**Figure S3.** Cycling performance of hollow SnO<sub>2</sub> spheres (with and without graphene wrapping) with 1 nm and 3 nm ALD coating.

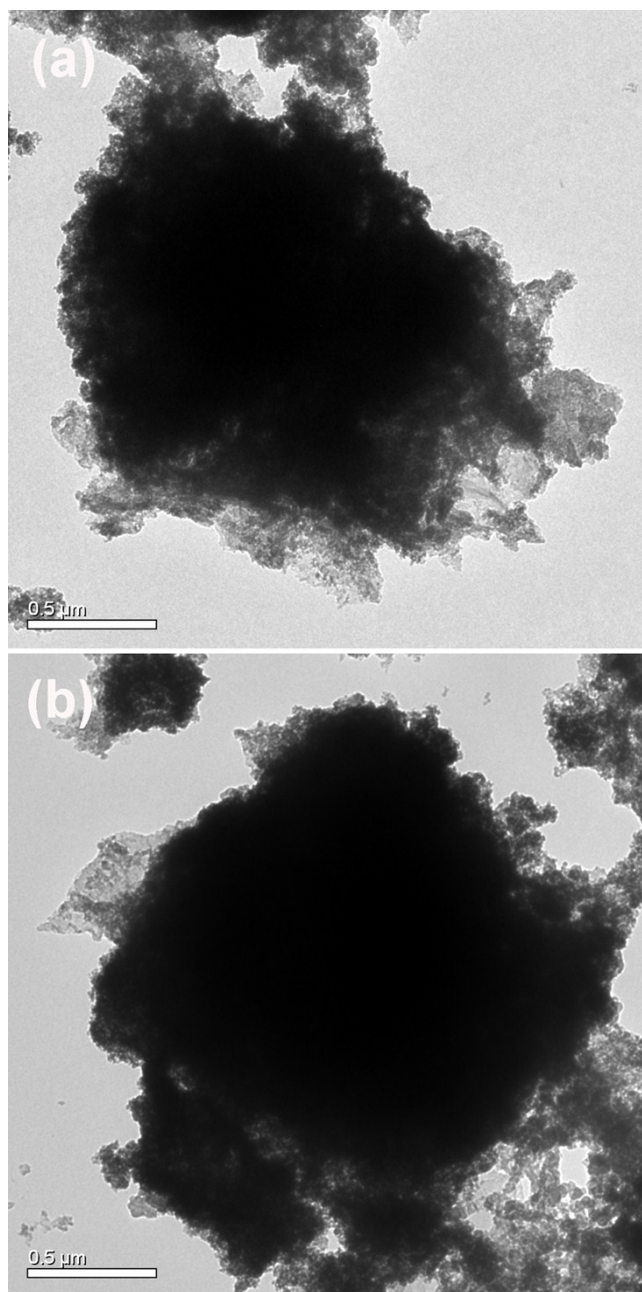

**Figure S4.** TEM images of  $\text{Al}_2\text{O}_3$  stabilized  $\text{SnO}_2$  HS/GO anode after 60 charge/discharge cycles.
